# Supplementary material
Source: Springer Nature journal article supplement (https://www.springermedizin.de/resource/supplementary/12889_2010_2166_MOESM1_ESM.pdf/9484818)

380,831 individuals assigned

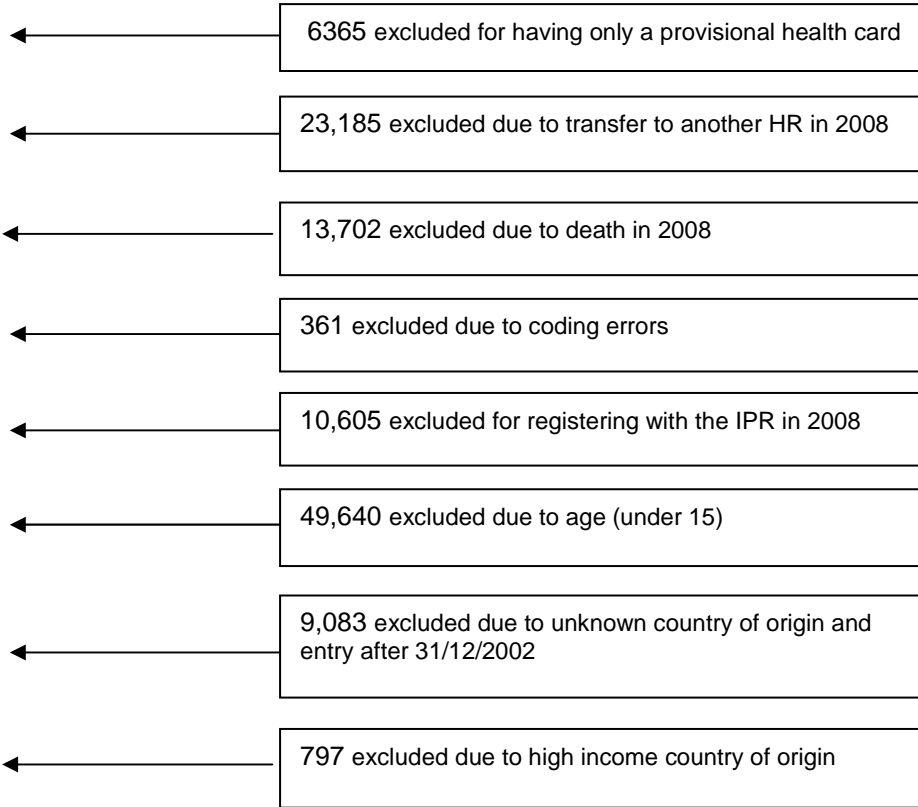

266,078 study individuals

Native  
232,717

Immigrant  
33,361

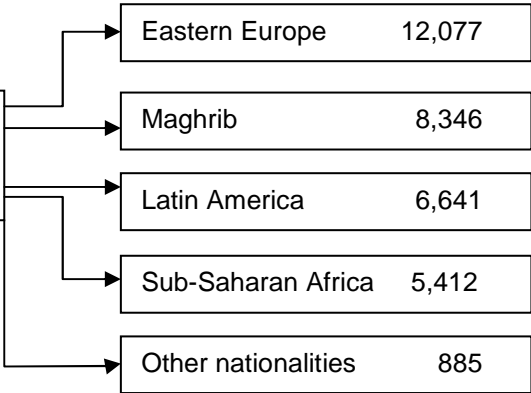

Supplement: MOESM1 [file 9484818]
